# Supplementary material for: Gene Expression Pattern of ESPL1, PTTG1 and PTTG1IP Can Potentially Predict Response to TKI First-Line Treatment of Patients with Newly Diagnosed CML
Source: MDPI journal article supplement (doi:10.3390/cancers15092652), 2023-05-08
Supplement: s1 [file s1]

Statistical data analyses on qRT-PCR  
data

The MEANS Procedure

| N   |          |        |         |         |         |          |
|-----|----------|--------|---------|---------|---------|----------|
| Obs | Variable | Mean   | Minimum | Maximum | Std Dev | Skewness |
| 97  | ESPL1    | 4.7234 | 1.5700  | 10.4670 | 1.7041  | 0.6839   |
|     | PTTG1    | 3.4122 | 0.2200  | 8.6870  | 1.3514  | 1.0842   |
|     | PTTG1IP  | 2.6362 | -0.8600 | 11.2100 | 2.2009  | 1.5566   |

| N            |     |          |        |         |         |         |
|--------------|-----|----------|--------|---------|---------|---------|
| Group        | Obs | Variable | Mean   | Minimum | Maximum | Std Dev |
| Nonresponder | 51  | ESPL1    | 4.5316 | 1.5700  | 10.4670 | 1.8573  |
|              |     | PTTG1    | 3.4099 | 0.2200  | 8.6870  | 1.7201  |
|              |     | PTTG1IP  | 2.8701 | -0.8600 | 11.2100 | 2.5744  |
| Responder    | 46  | ESPL1    | 4.9360 | 2.2030  | 7.7270  | 1.5080  |
|              |     | PTTG1    | 3.4147 | 1.0670  | 5.0330  | 0.7803  |
|              |     | PTTG1IP  | 2.3768 | -0.7570 | 7.5770  | 1.6850  |

|              |     | N        |          |
|--------------|-----|----------|----------|
| Gruppe       | Obs | Variable | Skewness |
| Nonresponder | 51  | ESPL1    | 1.1147   |
|              |     | PTTG1    | 1.0587   |
|              |     | PTTG1IP  | 1.5158   |
| Responder    | 46  | ESPL1    | 0.0608   |
|              |     | PTTG1    | -0.3149  |
|              |     | PTTG1IP  | 0.8980   |

| N        |     |          |       |         |         |         |
|----------|-----|----------|-------|---------|---------|---------|
| Group    | Obs | Variable | Mean  | Minimum | Maximum | Std Dev |
| Controls | 51  | ESPL1    | 5.892 | 3.217   | 7.383   | 0.757   |
|          |     | PTTG1    | 4.102 | 1.917   | 6.623   | 0.654   |
|          |     | PTTG1IP  | 3.073 | 0.063   | 4.997   | 0.927   |

# Distances and Cut-Offs

-----

## The MEANS Procedure

| N   |          |    |          |          |          |           |          |
|-----|----------|----|----------|----------|----------|-----------|----------|
| Obs | Variable | N  | Mean     | Median   | Minimum  | Maximum   | Std Dev  |
| 97  | Cut_off  | 97 | 2.622697 | 2.316287 | 0.549594 | 10.282123 | 1.619770 |
|     | Distance | 97 | 2.622742 | 2.316333 | 0.549649 | 10.282133 | 1.619762 |
|     | diff     | 97 | 0.000045 | 0.000046 | 0.000009 | 0.000054  | 0.000007 |

| N            |     |          |    |          |          |          |
|--------------|-----|----------|----|----------|----------|----------|
| Group        | Obs | Variable | N  | Mean     | Median   | Minimum  |
| Nonresponder | 51  | Cut_off  | 51 | 2.977449 | 2.465865 | 0.980357 |
|              |     | Distance | 51 | 2.977492 | 2.465910 | 0.980409 |
|              |     | diff     | 51 | 0.000043 | 0.000045 | 0.000009 |
| Responder    | 46  | Cut_off  | 46 | 2.229385 | 2.243670 | 0.549594 |
|              |     | Distance | 46 | 2.229432 | 2.243716 | 0.549649 |
|              |     | diff     | 46 | 0.000046 | 0.000046 | 0.000033 |

| N            |     |          |           |          |  |
|--------------|-----|----------|-----------|----------|--|
| Gruppe       | Obs | Variable | Maximum   | Std Dev  |  |
| Nonresponder | 51  | Cut_off  | 10.282123 | 2.021433 |  |
|              |     | Abstand  | 10.282133 | 2.021424 |  |
|              |     | diff     | 0.000052  | 0.000009 |  |
| Responder    | 46  | Cut_off  | 5.099709  | 0.869572 |  |
|              |     | Abstand  | 5.099743  | 0.869568 |  |
|              |     | diff     | 0.000054  | 0.000004 |  |

## Correlation Time-MMR and Cut-offs for all CML patients

---

### The CORR Procedure

```
2 With Variables:  Cut_off  Distance
1   Variables:    Time_MMR
```

Spearman Correlation Coefficients, N = 97  
Prob > |r| under H0: Rho=0

|          | Time_MMR          |
|----------|-------------------|
| Cut_off  | 0.09925<br>0.3335 |
| Distance | 0.09925<br>0.3335 |

### The CORR Procedure

2 With Variables: Cut\_off Distance  
 1 Variables: Time\_MMR

Spearman Correlation Coefficients, N = 51  
 Prob > |r| under H0: Rho=0

|          | Time_MMR          |
|----------|-------------------|
| Cut_off  | 0.03433<br>0.8110 |
| Distance | 0.03433<br>0.8110 |

### The CORR Procedure

2 With Variables: Cut\_off Distance  
 1 Variables: Time\_MMR

Spearman Correlation Coefficients, N = 46  
 Prob > |r| under H0: Rho=0

|          | Time_MMR           |
|----------|--------------------|
| Cut_off  | -0.21594<br>0.1495 |
| Distance | -0.21594<br>0.1495 |

## Distances

### The TTEST Procedure

Variable: Dist

| Group        | N  | Mean   | Std Dev | Std Err | Minimum | Maximum |
|--------------|----|--------|---------|---------|---------|---------|
| Nonresponder | 51 | 2.9775 | 2.0214  | 0.2831  | 0.9804  | 10.2821 |
| Responder    | 46 | 2.2294 | 0.8696  | 0.1282  | 0.5496  | 5.0997  |
| Diff (1-2)   |    | 0.7481 | 1.5839  | 0.3221  |         |         |

| Group        | Method        | Mean   | 95% CL Mean |        |
|--------------|---------------|--------|-------------|--------|
| Nonresponder |               | 2.9775 | 2.4090      | 3.5460 |
| Responder    |               | 2.2294 | 1.9712      | 2.4877 |
| Diff (1-2)   | Pooled        | 0.7481 | 0.1087      | 1.3875 |
| Diff (1-2)   | Satterthwaite | 0.7481 | 0.1282      | 1.3679 |

| Method        | Variances | DF     | t Value | Pr >  t |
|---------------|-----------|--------|---------|---------|
| Pooled        | Equal     | 95     | 2.32    | 0.0223  |
| Satterthwaite | Unequal   | 69.376 | 2.41    | 0.0187  |

### Equality of Variances

| Method   | Num DF | Den DF | F Value | Pr > F |
|----------|--------|--------|---------|--------|
| Folded F | 50     | 45     | 5.40    | <.0001 |

## Distances - Logistic regression

### The LOGISTIC Procedure

#### Model Information

|                           |                  |
|---------------------------|------------------|
| Data Set                  | WORK.K1          |
| Response Variable         | Group            |
| Number of Response Levels | 2                |
| Model                     | binary logit     |
| Optimization Technique    | Fisher's scoring |

|                             |    |
|-----------------------------|----|
| Number of Observations Read | 97 |
| Number of Observations Used | 97 |

#### Response Profile

| Ordered<br>Value | Group        | Total<br>Frequency |
|------------------|--------------|--------------------|
| 1                |              | 51                 |
| 2                | Nonresponder | 46                 |
|                  | Responder    |                    |

Probability modeled is Gruppe='Nonresponder'.

#### Model Convergence Status

Convergence criterion (GCONV=1E-8) satisfied.

#### Model Fit Statistics

| Criterion | Intercept<br>Only | Intercept<br>and<br>Covariates |
|-----------|-------------------|--------------------------------|
| AIC       | 136.213           | 132.129                        |
| SC        | 138.787           | 137.278                        |
| -2 Log L  | 134.213           | 128.129                        |

## Distances - Logistic regression

### The LOGISTIC Procedure

Testing Global Null Hypothesis: BETA=0

| Test             | Chi-Square | DF | Pr > ChiSq |
|------------------|------------|----|------------|
| Likelihood Ratio | 6.0842     | 1  | 0.0136     |
| Score            | 5.2123     | 1  | 0.0224     |
| Wald             | 4.2712     | 1  | 0.0388     |

### Analysis of Maximum Likelihood Estimates

| Parameter | DF | Estimate | Standard Error | Wald Chi-Square | Pr > ChiSq |
|-----------|----|----------|----------------|-----------------|------------|
| Intercept | 1  | -0.8817  | 0.5005         | 3.1032          | 0.0781     |
| Dist      | 1  | 0.3911   | 0.1892         | 4.2712          | 0.0388     |

### Odds Ratio Estimates

| Effect | Point Estimate | 95% Wald Confidence Limits |
|--------|----------------|----------------------------|
| Dist   | 1.479          | 1.020 2.143                |

### Association of Predicted Probabilities and Observed Responses

|                    |      |           |       |
|--------------------|------|-----------|-------|
| Percent Concordant | 58.7 | Somers' D | 0.174 |
| Percent Discordant | 41.3 | Gamma     | 0.174 |
| Percent Tied       | 0.0  | Tau-a     | 0.088 |
| Pairs              | 2346 | c         | 0.587 |

# ROC-Analyse DISTANCE

| Obs | Distance | prob_non | prob_<br>responder |
|-----|----------|----------|--------------------|
| 1   | 0        | 0.29283  | 0.70717            |
| 2   | 1        | 0.37975  | 0.62025            |
| 3   | 2        | 0.47515  | 0.52485            |
| 4   | 3        | 0.57239  | 0.42761            |
| 5   | 4        | 0.66434  | 0.33566            |
| 6   | 5        | 0.74532  | 0.25468            |
| 7   | 6        | 0.81228  | 0.18772            |
| 8   | 7        | 0.86483  | 0.13517            |
| 9   | 8        | 0.90440  | 0.09560            |
| 10  | 9        | 0.93328  | 0.06672            |
| 11  | 10       | 0.95388  | 0.04612            |
| 12  | 11       | 0.96834  | 0.03166            |
| 13  | 12       | 0.97836  | 0.02164            |

# Comparison Responder - Nonresponder

## The MEANS Procedure

| Group        | N<br>Obs | Variable    | N  | Mean      | Median    | Minimum  | Maximum    |
|--------------|----------|-------------|----|-----------|-----------|----------|------------|
| Nonresponder | 51       | Time_MMR    | 51 | 27.324    | 21.500    | 12.500   | 91.500     |
|              |          | Age         | 51 | 58.353    | 57.000    | 26.000   | 87.000     |
|              |          | Leukocytes  | 51 | 90977.451 | 52300.000 | 2000.000 | 404000.000 |
|              |          | Quotient    | 51 | 8.535     | 0.770     | 0.130    | 131.000    |
|              |          | Quotient IS | 15 | 3.141     | 2.600     | 0.130    | 8.400      |
| Responder    | 46       | Time_MMR    | 46 | 5.174     | 5.000     | 0.000    | 12.000     |
|              |          | Age         | 46 | 57.804    | 58.500    | 14.000   | 85.000     |
|              |          | Leukocytes  | 46 | 42089.130 | 11200.000 | 3400.000 | 316000.000 |
|              |          | Quotient    | 46 | 1.314     | 0.575     | 0.016    | 7.800      |
|              |          | Quotient IS | 22 | 2.225     | 0.795     | 0.012    | 9.200      |

| Group        | N<br>Obs | Variable    | Std Dev    | Coeff of<br>Variation |
|--------------|----------|-------------|------------|-----------------------|
| Nonresponder | 51       | Time_MMR    | 16.667     | 61.000                |
|              |          | Age         | 16.149     | 27.675                |
|              |          | Leukocytes  | 112439.960 | 123.591               |
|              |          | Quotient    | 20.937     | 245.305               |
|              |          | Quotient IS | 2.607      | 82.978                |
| Responder    | 46       | Time_MMR    | 3.013      | 58.241                |
|              |          | Age         | 17.490     | 30.257                |
|              |          | Leukocytes  | 64662.715  | 153.633               |
|              |          | Quotient    | 1.979      | 150.600               |
|              |          | Quotient IS | 2.630      | 118.237               |

## The FREQ Procedure

Table of Group by type of *BCR::ABL1* gene fusion

Group

| Frequency<br>Row Pct | b2a2        | b2a2.b3a<br>2 | b3a2        | e1a2      | Total |
|----------------------|-------------|---------------|-------------|-----------|-------|
| Nonresponder         | 21<br>42.00 | 8<br>16.00    | 19<br>38.00 | 2<br>4.00 | 50    |
| Responder            | 22<br>47.83 | 10<br>21.74   | 14<br>30.43 | 0<br>0.00 | 46    |
| Total                | 43          | 18            | 33          | 2         | 96    |

Frequency Missing = 1

Statistics for Table of Group by type of *BCR::ABL1* gene fusion

| Statistic                   | DF | Value  | Prob   |
|-----------------------------|----|--------|--------|
| Chi-Square                  | 3  | 2.8413 | 0.4167 |
| Likelihood Ratio Chi-Square | 3  | 3.6123 | 0.3065 |
| Mantel-Haenszel Chi-Square  | 1  | 1.2454 | 0.2644 |
| Phi Coefficient             |    | 0.1720 |        |
| Contingency Coefficient     |    | 0.1695 |        |
| Cramer's V                  |    | 0.1720 |        |

WARNING: 25% of the cells have expected counts less than 5. Chi-Square may not be a valid test.

## Fisher's Exact Test

|                       |        |
|-----------------------|--------|
| Table Probability (P) | 0.0064 |
| Pr <= P               | 0.4872 |

Effective Sample Size = 96

Frequency Missing = 1

## Comparison Responder - Nonresponder

---

### The FREQ Procedure

Table of Group by sex

Group      sex

| Frequency<br>Row Pct | F           | M           | Total |
|----------------------|-------------|-------------|-------|
| Nonresponder         | 21<br>41.18 | 30<br>58.82 | 51    |
| Responder            | 19<br>41.30 | 27<br>58.70 | 46    |
| Total                | 40          | 57          | 97    |

Statistics for Table of Group by sex

| Statistic                   | DF | Value   | Prob   |
|-----------------------------|----|---------|--------|
| Chi-Square                  | 1  | 0.0002  | 0.9898 |
| Likelihood Ratio Chi-Square | 1  | 0.0002  | 0.9898 |
| Continuity Adj. Chi-Square  | 1  | 0.0000  | 1.0000 |
| Mantel-Haenszel Chi-Square  | 1  | 0.0002  | 0.9899 |
| Phi Coefficient             |    | -0.0013 |        |
| Contingency Coefficient     |    | 0.0013  |        |
| Cramer's V                  |    | -0.0013 |        |

### Fisher's Exact Test

|                          |        |
|--------------------------|--------|
| Cell (1,1) Frequency (F) | 21     |
| Left-sided Pr <= F       | 0.5765 |
| Right-sided Pr >= F      | 0.5869 |
| Table Probability (P)    | 0.1634 |
| Two-sided Pr <= P        | 1.0000 |

Sample Size = 97

BCR::ABL1 quotient

The MEANS Procedure

Analysis Variable : Quotient

| N<br>Obs | Mean  | Median | Minimum | Maximum | Std Dev |
|----------|-------|--------|---------|---------|---------|
| 97       | 32.12 | 25.00  | 0.02    | 178.00  | 32.90   |

Analysis Variable : Quotient

| Group        | N<br>Obs | Mean  | Median | Minimum | Maximum |
|--------------|----------|-------|--------|---------|---------|
| Nonresponder | 51       | 35.38 | 26.00  | 0.15    | 178.00  |
| Responder    | 46       | 28.50 | 22.50  | 0.02    | 85.00   |

Analysis Variable : Quotient

| Group        | N<br>Obs | Std Dev |
|--------------|----------|---------|
| Nonresponder | 51       | 36.30   |
| Responder    | 46       | 28.62   |

## Quotient - U-Test

-----

### The NPAR1WAY Procedure

Wilcoxon Scores (Rank Sums) for Variable Quotient  
Classified by Variable Group

| Group        | N  | Sum of<br>Scores | Expected<br>Under H0 | Std Dev<br>Under H0 | Mean<br>Score |
|--------------|----|------------------|----------------------|---------------------|---------------|
| Nonresponder | 51 | 2661.0           | 2499.0               | 138.406029          | 52.176471     |
| Responder    | 46 | 2092.0           | 2254.0               | 138.406029          | 45.478261     |

Average scores were used for ties.

### Wilcoxon Two-Sample Test

Statistic 2092.0000

Normal Approximation

Z -1.1669

One-Sided Pr < Z 0.1216

Two-Sided Pr > |Z| 0.2433

t Approximation

One-Sided Pr < Z 0.1231

Two-Sided Pr > |Z| 0.2462

Z includes a continuity correction of 0.5.

### Kruskal-Wallis Test

Chi-Square 1.3700

DF 1

Pr > Chi-Square 0.2418

Correlation of relative transcript levels of *ESPL1*, *PTTG1* and *PTTG1IP* within the R, NR and control groups (Pearson correlation coefficients).

|                             | <b>controls</b><br>(n=51)   | <b>NR</b><br>(n=51)         | <b>R</b><br>(n=46)           |
|-----------------------------|-----------------------------|-----------------------------|------------------------------|
| <b><i>ESPL1/PTTG1</i></b>   | 0.25<br>( <i>p</i> =0.0761) | 0.58<br>( <i>p</i> <0.0001) | 0.55<br>( <i>p</i> <0.0001)  |
| <b><i>ESPL1/PTTG1IP</i></b> | 0.30<br>( <i>p</i> =0.0311) | 0.25<br>( <i>p</i> =0.0751) | -0.30<br>( <i>p</i> =0.0444) |
| <b><i>PTTG1/PTTG1IP</i></b> | 0.24<br>( <i>p</i> =0.0940) | 0.52<br>( <i>p</i> =0.0001) | 0.13<br>( <i>p</i> =0.3947)  |

Correlation between time until achievement of MMR and clinical parameters in CML patients (Spearman correlation coefficient)

| <b>Parameter</b>                    | <b>Test</b>    | <b>All (n=97)</b>           | <b>R (n=51)</b>          | <b>NR (n=46)</b>            |
|-------------------------------------|----------------|-----------------------------|--------------------------|-----------------------------|
| <b>Distance</b>                     | Spearman       | 0.10 ( <i>p</i> =0.334)     | -0.22 ( <i>p</i> =0.150) | 0.03 ( <i>p</i> =0.811)     |
| <b><i>BCR::ABL1</i> gene fusion</b> | Kruskal-Wallis | 0.21 ( <i>p</i> =0.258)     | 0.15 ( <i>p</i> =0.609)  | 0.31 ( <i>p</i> =0.182)     |
| <b>Sex</b>                          | U-test         | 0.04 ( <i>p</i> =0.665)     | 0.06 ( <i>p</i> =0.677)  | 0.11 ( <i>p</i> =0.427)     |
| <b>Age</b>                          | Spearman       | 0.02 ( <i>p</i> =0.873)     | -0.13 ( <i>p</i> =0.377) | 0.20 ( <i>p</i> =0.153)     |
| <b>TKI therapy*</b>                 | U-test         | -0.16<br>( <i>p</i> =0.247) | -0.46 ( <i>p</i> =0.019) | -0.25<br>( <i>p</i> =0.193) |

\*n=53 (55%), only patients receiving monotherapy with nilotinib or imatinib were included
