# Supplementary material for: Gene Expression Pattern of ESPL1, PTTG1 and PTTG1IP Can Potentially Predict Response to TKI First-Line Treatment of Patients with Newly Diagnosed CML
Source: MDPI journal article supplement (doi:10.3390/cancers15092652), 2023-05-08
Supplement: s1 [file s1]

CML patients (NR, R cohorts): rate of *BCR::ABL1* decline, halving and doubling times after 3 months of TKI treatment

| No.          | <i>BCR::ABL1</i> %<br>IS** (ID) | <i>BCR::ABL1</i> % IS**<br>3M | Halving time<br>(days) 3M | Doubling time (days)<br>3M |
|--------------|---------------------------------|-------------------------------|---------------------------|----------------------------|
| NR<br>(n=51) |                                 |                               |                           |                            |
| NR-1         | 18                              | 1.579                         | 49                        | -                          |
| NR-2         | 76                              | 2.000                         | 46                        | -                          |
| NR-3         | 22                              | 78                            | -                         | 35                         |
| NR-4         | 100                             | 29                            | 63                        | -                          |
| NR-5         | 31                              | 0.36                          | 46                        | -                          |
| NR-6         | 61                              | 6.5                           | 50                        | -                          |
| NR-7         | 14                              | 1.1                           | 49                        | -                          |
| NR-8         | 13                              | 2.1                           | 54                        | -                          |
| NR-9         | 0.48                            | 0.29                          | 114                       | -                          |
| NR-10        | 0.13                            | 0.19                          | -                         | 186                        |
| NR-11        | 31*                             | 3.8*                          | 51                        | -                          |
| NR-12        | 25                              | 14                            | 102                       | -                          |
| NR-13        | 52                              | 0.19                          | 45                        | -                          |
| NR-14        | 0.53                            | 0.25                          | 85                        | -                          |
| NR-15        | 51                              | 19                            | 72                        | -                          |
| NR-16        | 131                             | 7                             | 48                        | -                          |
| NR-17        | 52*                             | 19*                           | 71                        | -                          |
| NR-18        | 33                              | 3.5                           | 50                        | -                          |
| NR-19        | 43*                             | 35*                           | 242                       | -                          |
| NR-20        | 4.00*                           | 1.4*                          | 69                        | -                          |
| NR-21        | 38                              | 31                            | 244                       | -                          |
| NR-22        | 17                              | 0.54                          | 46                        | -                          |
| NR-23        | 80                              | 5.1                           | 48                        | -                          |
| NR-24        | 0.76                            | 2                             | -                         | 55                         |
| NR-25        | 1.80                            | 3.1                           | -                         | 125                        |
| NR-26        | 52                              | 2.4                           | 47                        | -                          |
| NR-27        | 26                              | 14                            | 98                        | -                          |
| NR-28        | 6.20*                           | 22*                           | -                         | 35                         |
| NR-29        | 28*                             | 5.8*                          | 57                        | -                          |
| NR-30        | 12*                             | 11*                           | 541                       | -                          |
| NR-31        | 8.40*                           | 24*                           | -                         | 48                         |
| NR-32        | 66                              | 28                            | 78                        | -                          |
| NR-33        | 3.90*                           | 0.0088*                       | 45                        | -                          |
| NR-34        | 20*                             | 38*                           | -                         | 100                        |
| NR-35        | 1.80                            | 1.80                          | -***                      | -                          |
| NR-36        | 39                              | 15                            | 73                        | -                          |
| NR-37        | 77                              | 24                            | 65                        | -                          |
| NR-38        | 178                             | 3.8                           | 46                        | -                          |
| NR-39        | 15                              | 0.62                          | 47                        | -                          |
| NR-40        | 4.1                             | 0.65                          | 54                        | -                          |
| NR-41        | 30*                             | 18*                           | 113                       | -                          |
| NR-42        | 2.60*                           | 0.24*                         | 50                        | -                          |
| NR-43        | 52                              | 9                             | 54                        | -                          |
| NR-44        | 102                             | 0.8                           | 45                        | -                          |
| NR-45        | 43                              | 17                            | 74                        | -                          |
| NR-46        | 57                              | 42                            | 171                       | -                          |
| NR-47        | 0.92                            | 0.42                          | 82                        | -                          |
| NR-48        | 45                              | 8.4                           | 55                        | -                          |
| NR-49        | 20*                             | 20*                           | -***                      | -                          |
| NR-50        | 4.20*                           | 39*                           | -                         | 11                         |
| NR-51        | 7.30                            | 20                            | -                         | 52                         |
| R<br>(n=46)  |                                 |                               |                           |                            |
| R-1          | 0.01*                           | 0.015*                        | -                         | 400                        |
| R-2          | 2.50                            | 0.035                         | 46                        | -                          |
| R-3          | 0.52                            | 0.043                         | 49                        | -                          |
| R-4          | 0.35                            | 0.032                         | 50                        | -                          |
| R-5          | 0.50                            | 0                             | 45                        | -                          |
| R-6          | 30                              | 0                             | 45                        | -                          |
| R-7          | 5.20                            | 0.077                         | 46                        | -                          |
| R-8          | 0.55                            | 0.041                         | 48                        | -                          |
| R-9          | 22                              | 0.085                         | 45                        | -                          |
| R-10         | 6.00                            | 0.028                         | 45                        | -                          |
| R-11         | 0.90                            | 0.041                         | 47                        | -                          |
| R-12         | 0.97                            | 0.018                         | 46                        | -                          |
| R-13         | 51                              | 0.047                         | 45                        | -                          |
| R-14         | 1.10                            | 0.0032                        | 45                        | -                          |

|          |       |        |      |     |
|----------|-------|--------|------|-----|
| R-15     | 0.30  | 0.086  | 63   | -   |
| R-16     | 68    | 0.073  | 45   | -   |
| R-17     | 48    | 0.061  | 45   | -   |
| R-18     | 0.18  | 0.043  | 60   | -   |
| R-19     | 78    | 0.088  | 45   | -   |
| R-20     | 0.12  | 0.53   | -    | 26  |
| R-21     | 4.20  | 2.7    | 126  | -   |
| R-22     | 34    | 0.13   | 45   | -   |
| R-23**** | 3.20  | 3.1    | 1455 | -   |
| R-24     | 85    | 7.2    | 49   | -   |
| R-25     | 23    | 0.28   | 46   | -   |
| R-26     | 73    | 0.92   | 46   | -   |
| R-27     | 6.00  | 0.00   | 45   | -   |
| R-28     | 36    | 0.18   | 45   | -   |
| R-29     | 49    | 0.042  | 45   | -   |
| R-30     | 53    | 1.9    | 47   | -   |
| R-31     | 55    | 0.46   | 45   | -   |
| R-32     | 70    | 0.18   | 45   | -   |
| R-33     | 48    | 0.14   | 45   | -   |
| R-34     | 9.20  | 0.0085 | 45   | -   |
| R-35     | 33    | 0.26   | 45   | -   |
| R-36     | 35    | 0.35   | 45   | -   |
| R-37     | 79    | 4.9    | 48   | -   |
| R-38     | 0.69  | 0.46   | 133  | -   |
| R-39     | 40    | 0.14   | 45   | -   |
| R-40     | 34    | 0.15   | 45   | -   |
| R-41     | 0.18* | 0.21*  | -    | 600 |
| R-42     | 5.60* | 0.20*  | 47   | -   |
| R-43     | 58    | 17     | 64   | -   |
| R-44     | 0.67  | 2      | -    | 45  |
| R-45     | 81    | 0.25   | 45   | -   |
| R-46     | 68    | 0.71   | 45   | -   |

CML, chronic myelogenous leukemia; Q, quotient; IS, International Scale; n, number of patients; NR, nonresponder, R, responder.

\* Due to non-sufficient sample quality the data of the following sample was used.

\*\* *BCR::ABL1*%Lab values were used in patients with *BCR::ABL1* >10%.

\*\*\* Due to lack of slope no halving time or doubling time could be calculated.

\*\*\*\* R Outlier omitted from analysis.
