# Supplementary material for: Gene Expression Pattern of ESPL1, PTTG1 and PTTG1IP Can Potentially Predict Response to TKI First-Line Treatment of Patients with Newly Diagnosed CML
Source: MDPI journal article supplement (doi:10.3390/cancers15092652), 2023-05-08
Supplement: s1 [file s1]

Distribution of therapies in CML patients (n=96) during the first 12 months after diagnosis

| Therapy                           | Frequency | Percentage |
|-----------------------------------|-----------|------------|
| Imatinib                          | 31        | 32.29%     |
| Nilotinib                         | 22        | 22.92%     |
| Dasatinib                         | 7         | 7.29%      |
| Bosutinib                         | 1         | 1.04%      |
| Imatinib - nilotinib              | 3         | 3.13%      |
| Imatinib - dasatinib              | 2         | 2.08%      |
| Imatinib - bosutinib              | 1         | 1.04%      |
| Nilotinib - dasatinib             | 2         | 2.08%      |
| Nilotinib - bosutinib - dasatinib | 1         | 1.04%      |
| IFN - imatinib                    | 1         | 1.04%      |
| IFN - nilotinib                   | 9         | 9.38%      |
| IFN - nilotinib - dasatinib       | 1         | 1.04%      |
| HU - imatinib                     | 1         | 1.04%      |
| HU - nilotinib                    | 2         | 2.08%      |
| HU - dasatinib                    | 1         | 1.04%      |
| HU - nilotinib - imatinib         | 2         | 2.08%      |
| HU - IFN - nilotinib              | 4         | 4.17%      |
| Ara-C - dasatinib - nilotinib     | 1         | 1.04%      |
| TKI - SZT                         | 4         | 4.17%      |
