# Supplementary material for: Gene Expression Pattern of ESPL1, PTTG1 and PTTG1IP Can Potentially Predict Response to TKI First-Line Treatment of Patients with Newly Diagnosed CML
Source: MDPI journal article supplement (doi:10.3390/cancers15092652), 2023-05-08
Supplement: s1 [file s1]

## CML patients characteristics

| No.       | Time until MMR (M) | BCR::ABL1 oncogene fusion type variants | Sex | Age (a) | Leukocytes/ul | BCR::ABL1 quotient (%) | Q(IS) | Initial therapy                      | ESPL1 ( $\Delta C_t$ value) | PTTG1 ( $\Delta C_t$ value) | PTTG1IP ( $\Delta C_t$ value) | Distance   |
|-----------|--------------------|-----------------------------------------|-----|---------|---------------|------------------------|-------|--------------------------------------|-----------------------------|-----------------------------|-------------------------------|------------|
| NR (n=51) |                    |                                         |     |         |               |                        |       |                                      |                             |                             |                               |            |
| NR-1      | > 12               | e13a2                                   | m   | 57      | 4800          | 18                     | -     | Nilotinib                            | 5.82                        | 3.66                        | 2.40                          | 1.1509645  |
| NR-2      | > 12               | e13a2                                   | m   | 49      | 97 300        | 76                     | -     | Nilotinib                            | 4.56                        | 4.04                        | 6.06                          | 3.48104761 |
| NR-3      | > 12               | e13a2                                   | m   | 45      | 21 800        | 22                     | -     | Dasatinib                            | 4.65                        | 3.74                        | 1.44                          | 1.24452253 |
| NR-4      | > 12               | e14a2                                   | m   | 63      | 399 000       | 100                    | -     | Imatinib, bosutinib                  | 3.38                        | 3.70                        | 1.48                          | 1.79366908 |
| NR-5      | 14                 | e13a2, e14a2                            | f   | 29      | 81 400        | 31                     | -     | Nilotinib + IFN $\alpha$             | 4.28                        | 3.81                        | 4.00                          | 1.48897486 |
| NR-6      | 14                 | e13a2, e14a2                            | f   | 48      | 36 700        | 61                     | -     | Imatinib                             | 2.95                        | 2.55                        | 1.96                          | 2.08587427 |
| NR-7      | > 14               | e13a2, e14a2                            | f   | 67      | 34 000        | 14                     | -     | Imatinib                             | 2.94                        | 2.77                        | 4.22                          | 2.46980874 |
| NR-8      | 15                 | e14a2                                   | f   | 61      | 5800          | 13                     | -     | Imatinib                             | 6.44                        | 3.86                        | -0.61                         | 3.69841823 |
| NR-9      | 16                 | e14a2                                   | m   | 83      | 2600          | 0.62                   | 0.48  | Imatinib                             | 6.65                        | 3.49                        | 1.96                          | 2.04215268 |
| NR-10     | 16                 | e14a2                                   | f   | 41      | 8000          | 0.15                   | 0.13  | Nilotinib, + IFN $\alpha$            | 8.26                        | 8.69                        | 10.29                         | 9.94418452 |
| NR-11     | 16                 | e14a2                                   | m   | 47      | 4500          | 31 *                   | -     | Imatinib, dasatinib                  | 5.64                        | 5.76                        | 2.67                          | 2.51663932 |
| NR-12     | > 16               | e14a2                                   | m   | 81      | 3500          | 25                     | -     | Imatinib + IFN $\alpha$              | 7.38                        | 3.29                        | 1.19                          | 3.02848383 |
| NR-13     | 17                 | e13a2, e14a2                            | m   | 75      | 40 200        | 52                     | -     | Dasatinib                            | 3.99                        | 3.13                        | 4.54                          | 2.05719732 |
| NR-14     | 17                 | e13a2                                   | m   | 51      | 6500          | 0.69                   | 0.53  | Nilotinib                            | 6.15                        | 3.73                        | -0.86                         | 3.78911643 |
| NR-15     | > 17               | e13a2                                   | m   | 59      | 75 500        | 51                     | -     | HU, imatinib                         | 2.84                        | 2.73                        | 1.38                          | 2.36368105 |
| NR-16     | 18                 | e13a2                                   | m   | 27      | 168 400       | 131                    | -     | Imatinib,dasatinib                   | 5.37                        | 5.06                        | 2.93                          | 1.79321232 |
| NR-17     | 18                 | e13a2                                   | m   | 41      | 18 200        | 52 *                   | -     | SZT §                                | 3.62                        | 2.61                        | 1.24                          | 1.95028029 |
| NR-18     | > 18               | e14a2                                   | m   | 57      | 57 000        | 33                     | -     | Nilotinib, + IFN $\alpha$            | 3.36                        | 0.51                        | 2.61                          | 3.20528788 |
| NR-19     | 19                 | e13a2                                   | f   | 66      | 256 150       | 43 *                   | -     | Imatinib                             | 2.32                        | 1.81                        | 1.36                          | 3.15674694 |
| NR-20     | 19                 | e13a2                                   | f   | 68      | 80 000        | 4.6 *                  | 4.0 * | Imatinib                             | 3.69                        | 3.76                        | 2.19                          | 1.17718998 |
| NR-21     | > 20               | e1a2                                    | m   | 87      | 52 300        | 38                     | -     | HU, nilotinib, + IFN $\alpha$        | 3.53                        | 3.26                        | 1.50                          | 1.65285429 |
| NR-22     | 21                 | e13a2, e14a2                            | f   | 33      | 9100          | 17                     | -     | Nilotinib                            | 7.95                        | 7.28                        | 9.65                          | 8.63501389 |
| NR-23     | 21                 | e14a2                                   | m   | 40      | 404 000       | 80                     | -     | Nilotinib                            | 2.66                        | 1.95                        | 3.30                          | 2.61145556 |
| NR-24     | 21                 | e14a2                                   | f   | 58      | 2000          | 0.99                   | 0.76  | Nilotinib, imatinib                  | 5.75                        | 3.23                        | -0.79                         | 3.57913382 |
| NR-25     | 21                 | e14a2                                   | m   | 49      | 4900 *        | 2.3                    | 1.8   | Nilotinib                            | 2.76                        | 1.78                        | 1.34                          | 2.86096701 |
| NR-26     | > 21               | e14a2                                   | f   | 67      | 23 900        | 52                     | -     | HU, nilotinib                        | 2.57                        | 2.03                        | 1.68                          | 2.73141038 |
| NR-27     | 23                 | e13a2                                   | m   | 49      | 61 400        | 26                     | -     | HU, nilotinib, imatinib              | 7.40                        | 8.42                        | 11.21                         | 10.2821235 |
| NR-28     | 23                 | e14a2                                   | f   | 70      | 297 400       | 7.1 *                  | 6.2 * | Imatinib                             | 1.57                        | 1.29                        | 2.54                          | 3.80218629 |
| NR-29     | 23                 | e13a2, e14a2                            | m   | 76      | 40 400        | 28 *                   | -     | Imatinib                             | 5.02                        | 1.54                        | -0.11                         | 3.33436272 |
| NR-30     | 25                 | e13a2, e14a2                            | f   | 48      | 113 700       | 12 *                   | -     | Imatinib                             | 2.83                        | 4.48                        | 2.88                          | 2.18959133 |
| NR-31     | 25                 | e14a2                                   | f   | 70      | 80 100        | 9.6 *                  | 8.4 * | Imatinib                             | 3.61                        | 2.48                        | 2.14                          | 1.53416077 |
| NR-32     | 26                 | e14a2                                   | m   | 50      | 118 000       | 66                     | -     | Nilotinib + IFN $\alpha$ , dasatinib | 4.39                        | 3.72                        | 4.68                          | 2.096926   |
| NR-33     | 27                 | e13a2                                   | m   | 50      | 149 700       | 4.4 *                  | 3.9 * | Imatinib                             | 3.48                        | 2.57                        | 3.45                          | 1.70805384 |
| NR-34     | 28                 | e14a2                                   | m   | 59      | 9300          | 20 *                   | -     | Imatinib §                           | 8.33                        | 0.69                        | 6.46                          | 5.91799879 |
| NR-35     | 29                 | e13a2, e14a2                            | m   | 78      | 5200          | 2.1                    | 1.8   | Imatinib                             | 6.79                        | 3.24                        | 1.31                          | 2.46586457 |
| NR-36     | 29                 | e13a2                                   | m   | 28      | 380 000       | 39                     | -     | Ara-C, dasatinib, nilotinib          | 4.20                        | 5.12                        | 7.07                          | 4.78144163 |
| NR-37     | 29                 | e13a2                                   | m   | 57      | 200 000       | 77                     | -     | Imatinib                             | 3.56                        | 4.65                        | 3.35                          | 1.84053346 |
| NR-38     | 30                 | e14a2                                   | f   | 83      | 33 700        | 178                    | -     | Imatinib                             | 3.56                        | 4.57                        | 0.91                          | 2.3763382  |
| NR-39     | 31                 | e13a2                                   | m   | 84      | 5300          | 15                     | -     | Imatinib §                           | 4.03                        | 3.47                        | 1.47                          | 1.35525053 |
| NR-40     | 33                 | e14a2                                   | m   | 26      | 56 800        | 4.7                    | 4.1   | HU, nilotinib, + IFN $\alpha$        | 3.18                        | 3.15                        | 5.22                          | 3.02180282 |

|        |      |              |   |    |         |         |         |                               |        |        |        |             |
|--------|------|--------------|---|----|---------|---------|---------|-------------------------------|--------|--------|--------|-------------|
| NR-41  | > 32 | e13a2        | f | 60 | 355 000 | 30 *    | -       | Nilotinib                     | 2.89   | 1.62   | 1.57   | 2.77144409  |
| NR-42  | 35 † | e13a2        | m | 86 | 56 300  | 2.9 *   | 2.6 *   | Imatinib                      | 3.44   | 2.77   | 3.72   | 1.79973951  |
| NR-43  | 36   | e14a2        | f | 56 | 181 000 | 52      | -       | HU, nilotinib, + IFN $\alpha$ | 3.50   | 3.03   | 1.62   | 1.63749564  |
| NR-44  | 40   | e13a2        | f | 69 | 59 200  | 102     | -       | HU, nilotinib, imatinib       | 5.05   | 4.13   | 3.22   | 0.98035671  |
| NR-45  | 41   | e14a2        | f | 52 | 87 600  | 43      | -       | Nilotinib                     | 3.38   | 1.95   | 2.16   | 2.03974546  |
| NR-46  | > 42 | e13a2        | f | 71 | 7200    | 57      | -       | Imatinib                      | 4.33   | 3.21   | 1.10   | 1.60182682  |
| NR-47  | 51   | e13a2        | f | 49 | 5000    | 1.2     | 0.92    | Nilotinib, bosutinib,         | 6.05   | 3.93   | -0.07  | 3.06143084  |
| NR-48  | 51   | e14a2        | f | 57 | 264 000 | 45      | -       | Imatinib                      | 2.69   | 2.11   | 5.34   | 3.62448904  |
| NR-49  | 64   | e13a2        | m | 67 | 45 000  | 20 *    | -       | Imatinib                      | 3.72   | 0.22   | 2.66   | 3.34715154  |
| NR-50  | 86   | e13a2        | m | 50 | 120 000 | 4.8 *   | 4.2 *   | Imatinib §                    | 4.10   | 3.14   | 1.49   | 1.33599705  |
| NR-51  | > 91 | e13a2        | m | 82 | 11 000  | 8.3     | 7.3     | Imatinib                      | 10.47  | 6.21   | 1.85   | 6.43528565  |
| R      |      |              |   |    |         |         |         |                               |        |        |        |             |
| (n=46) |      |              |   |    |         |         |         |                               |        |        |        |             |
| R-1    | <1   | e13a2        | m | 56 | 7300    | 0.016 * | 0.012 * | Dasatinib                     | 6.31 # | 4.27 # | 0.61 # | 2.710390892 |
| R-2    | 1    | e13a2        | f | 77 | 7000    | 2.8     | 2.5     | Imatinib                      | 6.53   | 3.39   | 1.18   | 2.31628687  |
| R-3    | 1    | e13a2        | m | 59 | 4400    | 0.59    | 0.52    | Imatinib                      | 6.60   | 4.53   | 1.09   | 2.67870454  |
| R-4    | 2    | e13a2        | m | 79 | 6900    | 0.40    | 0.35    | Imatinib                      | 6.88   | 4.35   | 2.77   | 2.35835513  |
| R-5    | 2    | e13a2        | m | 63 | 10 300  | 0.57    | 0.50    | Imatinib                      | 6.26   | 3.32   | 0.96   | 2.27796892  |
| R-6    | 2    | e13a2, e14a2 | f | 71 | 7300    | 30      | -       | Nilotinib, + IFN $\alpha$     | 6.22   | 3.39   | 1.29   | 2.01502596  |
| R-7    | 2    | e13a2        | m | 85 | 3400    | 6.7     | 5.2     | Imatinib                      | 6.62   | 3.54   | 0.56   | 2.81511634  |
| R-8    | 2    | e13a2        | m | 27 | 3500    | 0.71    | 0.55    | Nilotinib + IFN $\alpha$      | 7.28   | 3.38   | 1.49   | 2.7992215   |
| R-9    | 2    | e14a2        | f | 73 | 7000    | 22      | -       | Nilotinib                     | 5.47   | 4.09   | 3.89   | 1.60533761  |
| R-10   | 2    | e14a2        | f | 57 | 5800    | 7.8     | 6.0     | Imatinib                      | 5.33   | 3.75   | 2.93   | 0.75028429  |
| R-11   | 2    | e13a2, e14a2 | f | 65 | 6700    | 0.91    | 0.90    | Dasatinib                     | 6.40   | 3.67   | 0.71   | 2.56405509  |
| R-12   | 3    | e14a2        | f | 41 | 6700    | 1.1     | 0.97    | HU, dasatinib                 | 7.73   | 5.03   | 3.32   | 3.4813814   |
| R-13   | 3    | e13a2        | m | 28 | 68 600  | 51      | -       | n.k.                          | 3.49   | 3.15   | 7.58   | 5.09970931  |
| R-14   | 3    | e14a2        | m | 53 | 12 100  | 1.3     | 1.1     | Dasatinib, nilotinib          | 5.35   | 3.40   | 0.66   | 2.06936814  |
| R-15   | 3    | e14a2        | m | 84 | 5300    | 0.39    | 0.30    | Imatinib                      | 7.23   | 3.59   | 1.22   | 2.88036624  |
| R-16   | 3    | e13a2        | f | 63 | 19 700  | 68      | -       | Nilotinib, + IFN $\alpha$     | 3.69   | 3.33   | -0.76  | 3.54711159  |
| R-17   | 3    | e13a2, e14a2 | m | 53 | 208 000 | 48      | -       | Dasatinib                     | 4.20   | 2.62   | 3.98   | 1.64779753  |
| R-18   | 3    | e13a2        | m | 72 | 6200    | 0.20    | 0.18    | Nilotinib                     | 6.69   | 4.99   | 3.11   | 2.56594547  |
| R-19   | 4    | e13a2, e14a2 | f | 28 | 178 000 | 78      | -       | Dasatinib                     | 3.26   | 1.89   | 2.47   | 2.12202709  |
| R-20   | 5    | e13a2, e14a2 | m | 54 | 6300    | 0.14    | 0.12    | Imatinib                      | 5.66   | 3.45   | 2.46   | 0.95146552  |
| R-21   | 5    | e13a2        | m | 59 | 7100    | 4.8     | 4.2     | Bosutinib                     | 6.80   | 4.35   | 2.47   | 2.28305344  |
| R-22   | 5    | e13a2        | m | 28 | 13 800  | 34      | -       | Nilotinib                     | 3.96   | 3.29   | 2.64   | 0.77309536  |
| R-23   | 5    | e13a2, e14a2 | f | 49 | 3500    | 4.2     | 3.2     | Imatinib                      | 6.84   | 3.54   | 0.31   | 3.14972273  |
| R-24   | 5    | e13a2, e14a2 | m | 48 | 43 800  | 85      | -       | Nilotinib                     | 2.20   | 2.62   | 0.99   | 3.1151815   |
| R-25   | 5    | e13a2, e14a2 | m | 70 | 4300    | 23      | -       | Nilotinib                     | 4.31   | 3.76   | 2.31   | 0.63311903  |
| R-26   | 6    | e13a2        | m | 14 | 316 000 | 73      | -       | Imatinib                      | 2.82   | 3.27   | 1.52   | 2.20937021  |
| R-27   | 6    | e13a2, e14a2 | f | 54 | 27 600  | 6.8     | 6.0     | Nilotinib                     | 4.89   | 4.44   | 5.93   | 3.45230304  |
| R-28   | 6    | e14a2        | f | 70 | 25 600  | 36      | -       | Nilotinib                     | 3.09   | 2.52   | 2.59   | 1.86434459  |
| R-29   | 6    | e14a2        | m | 85 | 86 600  | 49      | -       | Nilotinib, + IFN $\alpha$     | 3.49   | 2.52   | 1.07   | 2.18067486  |
| R-30   | 6    | e14a2        | m | 73 | 26 100  | 53      | -       | Nilotinib + IFN $\alpha$      | 3.89   | 2.69   | 2.26   | 1.16230935  |
| R-31   | 6    | e13a2        | m | 47 | 166 000 | 55      | -       | Nilotinib                     | 2.56   | 2.81   | 1.66   | 2.44476357  |
| R-32   | 6    | e14a2        | f | 67 | 46 600  | 70      | -       | Nilotinib + IFN $\alpha$      | 3.10   | 2.50   | 1.78   | 2.05186993  |
| R-33   | 6    | e14a2        | f | 50 | 22 000  | 48      | -       | Nilotinib                     | 3.64   | 3.24   | 2.27   | 1.15696755  |
| R-34   | 7    | e13a2        | m | 76 | 8800    | 12      | 9.2     | Nilotinib, imatinib           | 4.99   | 3.79   | 0.49   | 2.19555536  |
| R-35   | 7    | e14a2        | f | 67 | 38 200  | 33      | -       | Dasatinib                     | 3.67   | 3.31   | 4.11   | 1.81004372  |

|                         |    |              |   |    |         |        |        |                              |      |      |      |            |
|-------------------------|----|--------------|---|----|---------|--------|--------|------------------------------|------|------|------|------------|
| R-36                    | 8  | e13a2        | m | 52 | 43 800  | 35     | -      | Imatinib                     | 4.26 | 4.07 | 4.60 | 2.12471051 |
| R-37                    | 8  | e13a2        | m | 43 | 132 000 | 79     | -      | HU, nilotinib + IFN $\alpha$ | 4.17 | 4.49 | 5.22 | 2.85642954 |
| R-38                    | 8  | e13a2        | m | 46 | 5100    | 0.90   | 0.69   | Nilotinib                    | 6.27 | 3.65 | 0.74 | 2.45640781 |
| R-39                    | 8  | e13a2        | f | 38 | 5300    | 40     | -      | Nilotinib                    | 5.62 | 3.27 | 1.13 | 1.75704563 |
| R-40                    | 8  | e14a2        | f | 58 | 8400    | 34     | -      | Nilotinib                    | 5.91 | 3.06 | 1.89 | 1.44123408 |
| R-41                    | 8  | e13a2        | m | 78 | 35 100  | 0.23 * | 0.18 * | Imatinib                     | 3.72 | 2.37 | 1.91 | 1.61878044 |
| R-42                    | 10 | e14a2        | f | 84 | 93 700  | 6.4 *  | 5.6 *  | Imatinib, nilotinib          | 3.29 | 4.18 | 5.40 | 3.20993476 |
| R-43                    | 11 | e13a2, e14a2 | m | 66 | 70 900  | 58     | -      | Nilotinib                    | 3.61 | 2.83 | 4.15 | 1.96404214 |
| R-44                    | 11 | e13a2        | f | 68 | 5200    | 0.87   | 0.67   | Nilotinib, dasatinib         | 5.17 | 3.12 | 2.76 | 0.54959446 |
| R-45                    | 11 | e13a2        | m | 32 | 17 100  | 81     | -      | HU, nilotinib                | 4.58 | 1.07 | 3.25 | 2.42932439 |
| R-46                    | 12 | e14a2        | f | 49 | 103 000 | 68     | -      | Nilotinib                    | 3.04 | 3.16 | 4.34 | 2.40591712 |
| Control group<br>(n=51) |    |              |   |    |         |        |        |                              |      |      |      |            |
| K-1                     |    |              |   |    |         |        |        |                              | 6.60 | 4.72 | 3.60 |            |
| K-2                     |    |              |   |    |         |        |        |                              | 5.79 | 4.74 | 2.70 |            |
| K-3                     |    |              |   |    |         |        |        |                              | 3.22 | 1.92 | 1.87 |            |
| K-4                     |    |              |   |    |         |        |        |                              | 5.15 | 4.37 | 2.48 |            |
| K-5                     |    |              |   |    |         |        |        |                              | 4.52 | 3.28 | 1.76 |            |
| K-6                     |    |              |   |    |         |        |        |                              | 5.00 | 4.92 | 2.76 |            |
| K-7                     |    |              |   |    |         |        |        |                              | 5.77 | 4.23 | 3.64 |            |
| K-8                     |    |              |   |    |         |        |        |                              | 5.89 | 6.62 | 3.01 |            |
| K-9                     |    |              |   |    |         |        |        |                              | 6.83 | 4.47 | 3.44 |            |
| K-10                    |    |              |   |    |         |        |        |                              | 6.61 | 3.50 | 3.23 |            |
| K-11                    |    |              |   |    |         |        |        |                              | 5.59 | 3.79 | 3.06 |            |
| K-12                    |    |              |   |    |         |        |        |                              | 5.84 | 3.89 | 4.61 |            |
| K-13                    |    |              |   |    |         |        |        |                              | 5.88 | 4.20 | 4.41 |            |
| K-14                    |    |              |   |    |         |        |        |                              | 6.06 | 4.71 | 5.00 |            |
| K-15                    |    |              |   |    |         |        |        |                              | 6.76 | 3.86 | 4.01 |            |
| K-16                    |    |              |   |    |         |        |        |                              | 6.74 | 3.83 | 3.54 |            |
| K-17                    |    |              |   |    |         |        |        |                              | 6.16 | 3.89 | 3.18 |            |
| K-18                    |    |              |   |    |         |        |        |                              | 6.01 | 3.35 | 2.79 |            |
| K-19                    |    |              |   |    |         |        |        |                              | 5.17 | 4.83 | 3.78 |            |
| K-20                    |    |              |   |    |         |        |        |                              | 5.58 | 3.97 | 3.68 |            |
| K-21                    |    |              |   |    |         |        |        |                              | 6.02 | 4.28 | 4.45 |            |
| K-22                    |    |              |   |    |         |        |        |                              | 5.58 | 5.62 | 2.24 |            |
| K-23                    |    |              |   |    |         |        |        |                              | 6.22 | 4.37 | 3.91 |            |
| K-24                    |    |              |   |    |         |        |        |                              | 6.26 | 4.76 | 4.15 |            |
| K-25                    |    |              |   |    |         |        |        |                              | 6.25 | 3.63 | 3.92 |            |
| K-26                    |    |              |   |    |         |        |        |                              | 5.22 | 4.26 | 3.94 |            |
| K-27                    |    |              |   |    |         |        |        |                              | 7.32 | 4.26 | 2.94 |            |
| K-28                    |    |              |   |    |         |        |        |                              | 5.25 | 4.15 | 3.98 |            |
| K-29                    |    |              |   |    |         |        |        |                              | 6.39 | 4.33 | 3.05 |            |
| K-30                    |    |              |   |    |         |        |        |                              | 5.75 | 4.02 | 3.53 |            |
| K-31                    |    |              |   |    |         |        |        |                              | 5.57 | 3.88 | 3.01 |            |
| K-32                    |    |              |   |    |         |        |        |                              | 5.61 | 4.04 | 0.06 |            |
| K-33                    |    |              |   |    |         |        |        |                              | 6.52 | 3.43 | 2.58 |            |
| K-34                    |    |              |   |    |         |        |        |                              | 5.66 | 3.86 | 3.54 |            |
| K-35                    |    |              |   |    |         |        |        |                              | 4.69 | 4.24 | 3.09 |            |
| K-36                    |    |              |   |    |         |        |        |                              | 5.92 | 3.71 | 2.71 |            |

|      |      |      |      |
|------|------|------|------|
| K-37 | 6.16 | 4.15 | 2.24 |
| K-38 | 5.43 | 4.08 | 3.66 |
| K-39 | 6.89 | 3.83 | 3.33 |
| K-40 | 6.26 | 3.93 | 3.29 |
| K-41 | 6.40 | 3.45 | 2.50 |
| K-42 | 4.72 | 3.26 | 0.88 |
| K-43 | 7.38 | 4.32 | 3.99 |
| K-44 | 6.09 | 3.92 | 2.84 |
| K-45 | 4.63 | 3.67 | 2.74 |
| K-46 | 6.51 | 4.03 | 2.33 |
| K-47 | 6.69 | 4.34 | 2.99 |
| K-48 | 5.77 | 4.01 | 2.17 |
| K-49 | 5.79 | 4.44 | 1.80 |
| K-50 | 6.48 | 4.09 | 2.13 |
| K-51 | 5.96 | 3.76 | 2.22 |

CML, chronic myelogenous leukemia; MMR, major molecular remission; Q, *BCR::ABL1* quotient; IS, International Scale; n, number of patients; NR, nonresponder, R, responder; n.k., not known; IFN $\alpha$ , Interferon- $\alpha$ ; HU, Hydroxyurea; SZT, stem cell transplantation; Ara-C, Cytarabin.

> Further data not available

§ MMR after SZT

\* Due to non-sufficient sample quality the data of the following sample was used

# Due to non-available cDNA material the subsequent sample (1 month later) was used

† Death by blast crisis
