# Supplementary figures and images for: Gene Expression Pattern of ESPL1, PTTG1 and PTTG1IP Can Potentially Predict Response to TKI First-Line Treatment of Patients with Newly Diagnosed CML
Source: MDPI journal article supplement (doi:10.3390/cancers15092652), 2023-05-08

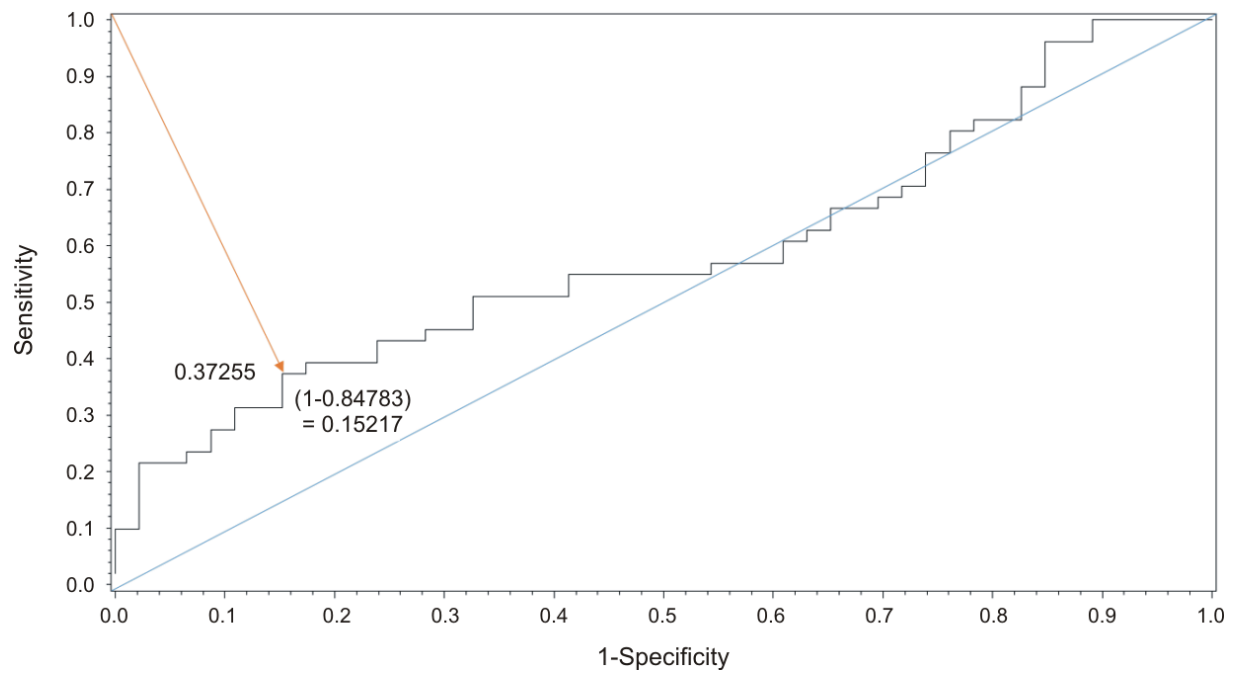

ROC curve for cut-offs of CML samples analyzed (n=97).  
AUC value = 0.587

Supplement: s1 [file s1]
